# Supplementary material
Source: PubMed Central journal article supplement (PMC3052597)
Supplement: supp_91_10_2485__1.pdf [file supp_91_10_2485__1.pdf]

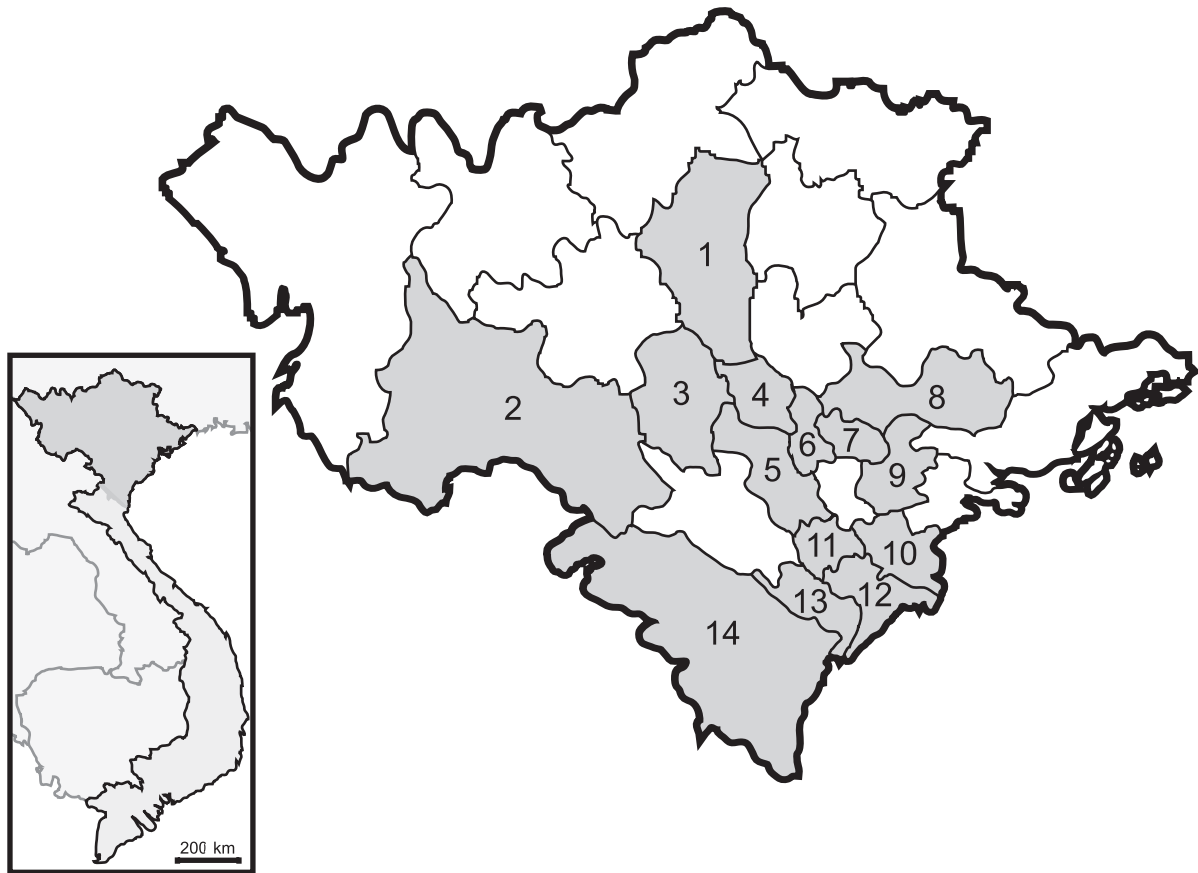

**Supplementary Fig. S1.** Map of the provinces of northern Vietnam. The H5N1 influenza viruses analysed in this study were isolated from the provinces shown in grey. The numbers indicate the following provinces: 1, Tuyen Quang; 2, Son La; 3, Phu Tho; 4, Vinh Phuc; 5, Ha Tay; 6, Ha Noi; 7, Bac Ninh; 8, Bac Giang; 9, Hai Duong; 10, Thai Binh; 11, Ha Nam; 12, Nam Dinh; 13, Ninh Binh; 14, Thanh Hoa.

**Supplementary Fig. S2.** Phylogenetic relationships of the (a) PB2, (b) PB1, (c) PA, (d) NP, (e) NA, (f) M and (g) NS genes of H5N1 influenza viruses isolated from patients in Vietnam. Numbers above and below the branch nodes indicate neighbour-joining bootstrap values. Analyses were based on nt 1026–2199, 43–1256, 772–2163, 106–924, 63–1367, 74–782, and 83–745 for the PB2, PB1, PA, NP, NA, M and NS genes, respectively. All trees were rooted to *A/goose/Guangdong/1/96*. Viruses analysed in this study are shown in red (clade 1) and blue (clade 2.3.4). Scale bar, 0.01 nucleotide substitutions per site. Abbreviations: Ck, chicken; Dk, duck; Qa, quail; Tk, turkey; BHG, bar-headed goose; Gs, goose; MDk, Muscovy duck; WSw, whooper swan; HC, house crow; TS, tree sparrow.

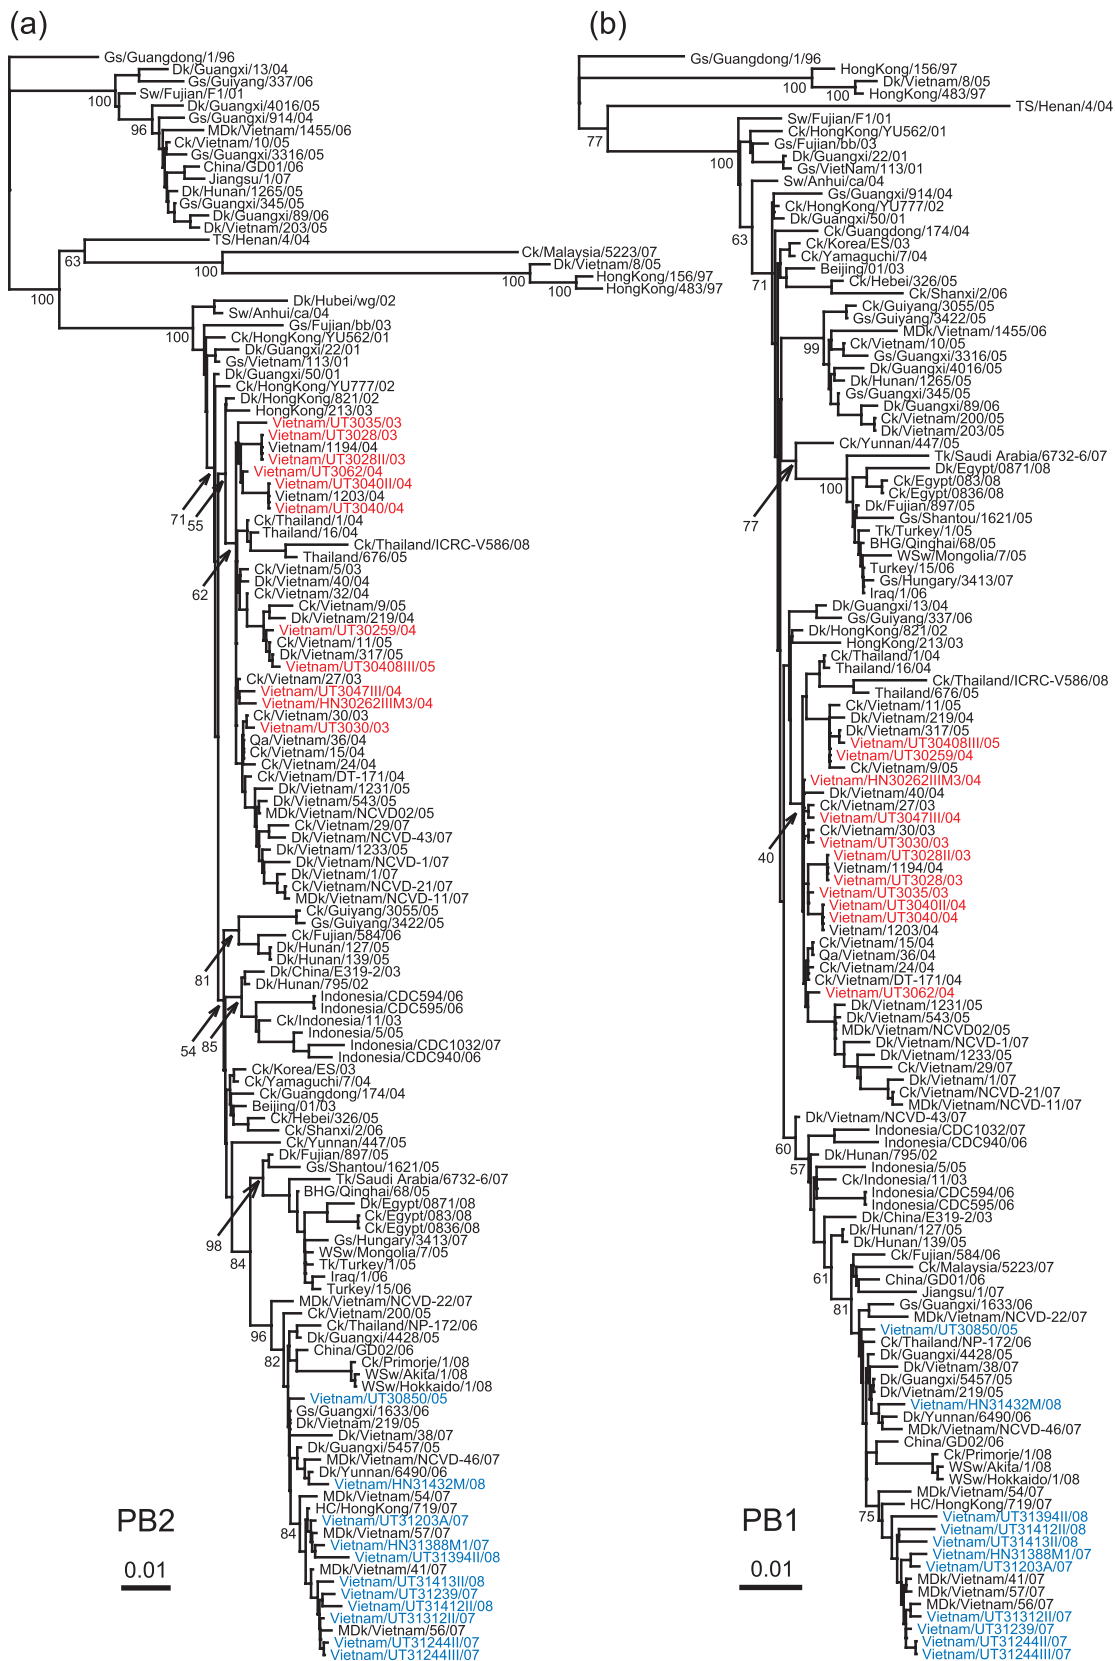

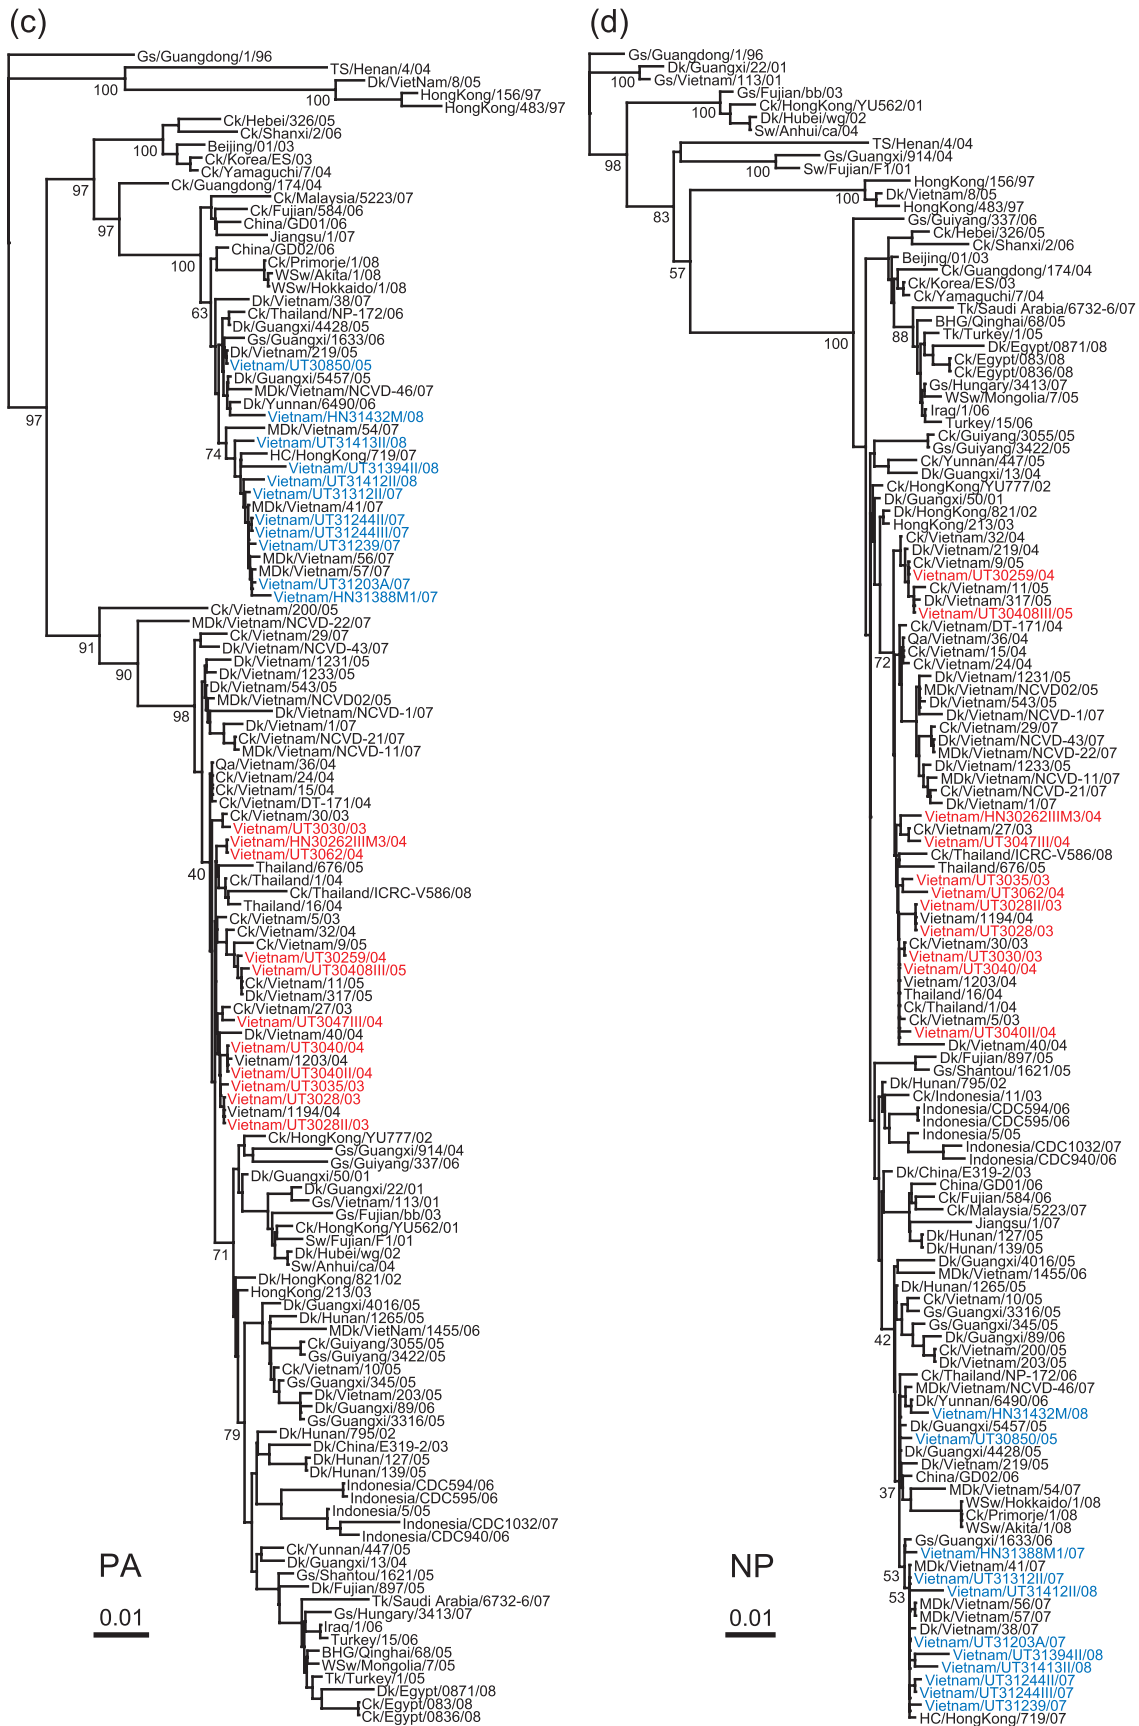

Le, Q. M., Ito, M., Muramoto, Y., Hoang, P. V. M., Vuong, C. D., Sakai-Tagawa, Y., Kiso, M., Ozawa, M., Takano, R. & Kawaoka, Y. (2010). Pathogenicity of highly pathogenic avian H5N1 influenza A viruses isolated from humans between 2003 and 2008 in northern Vietnam. *J Gen Virol* 91, 2485–2490.

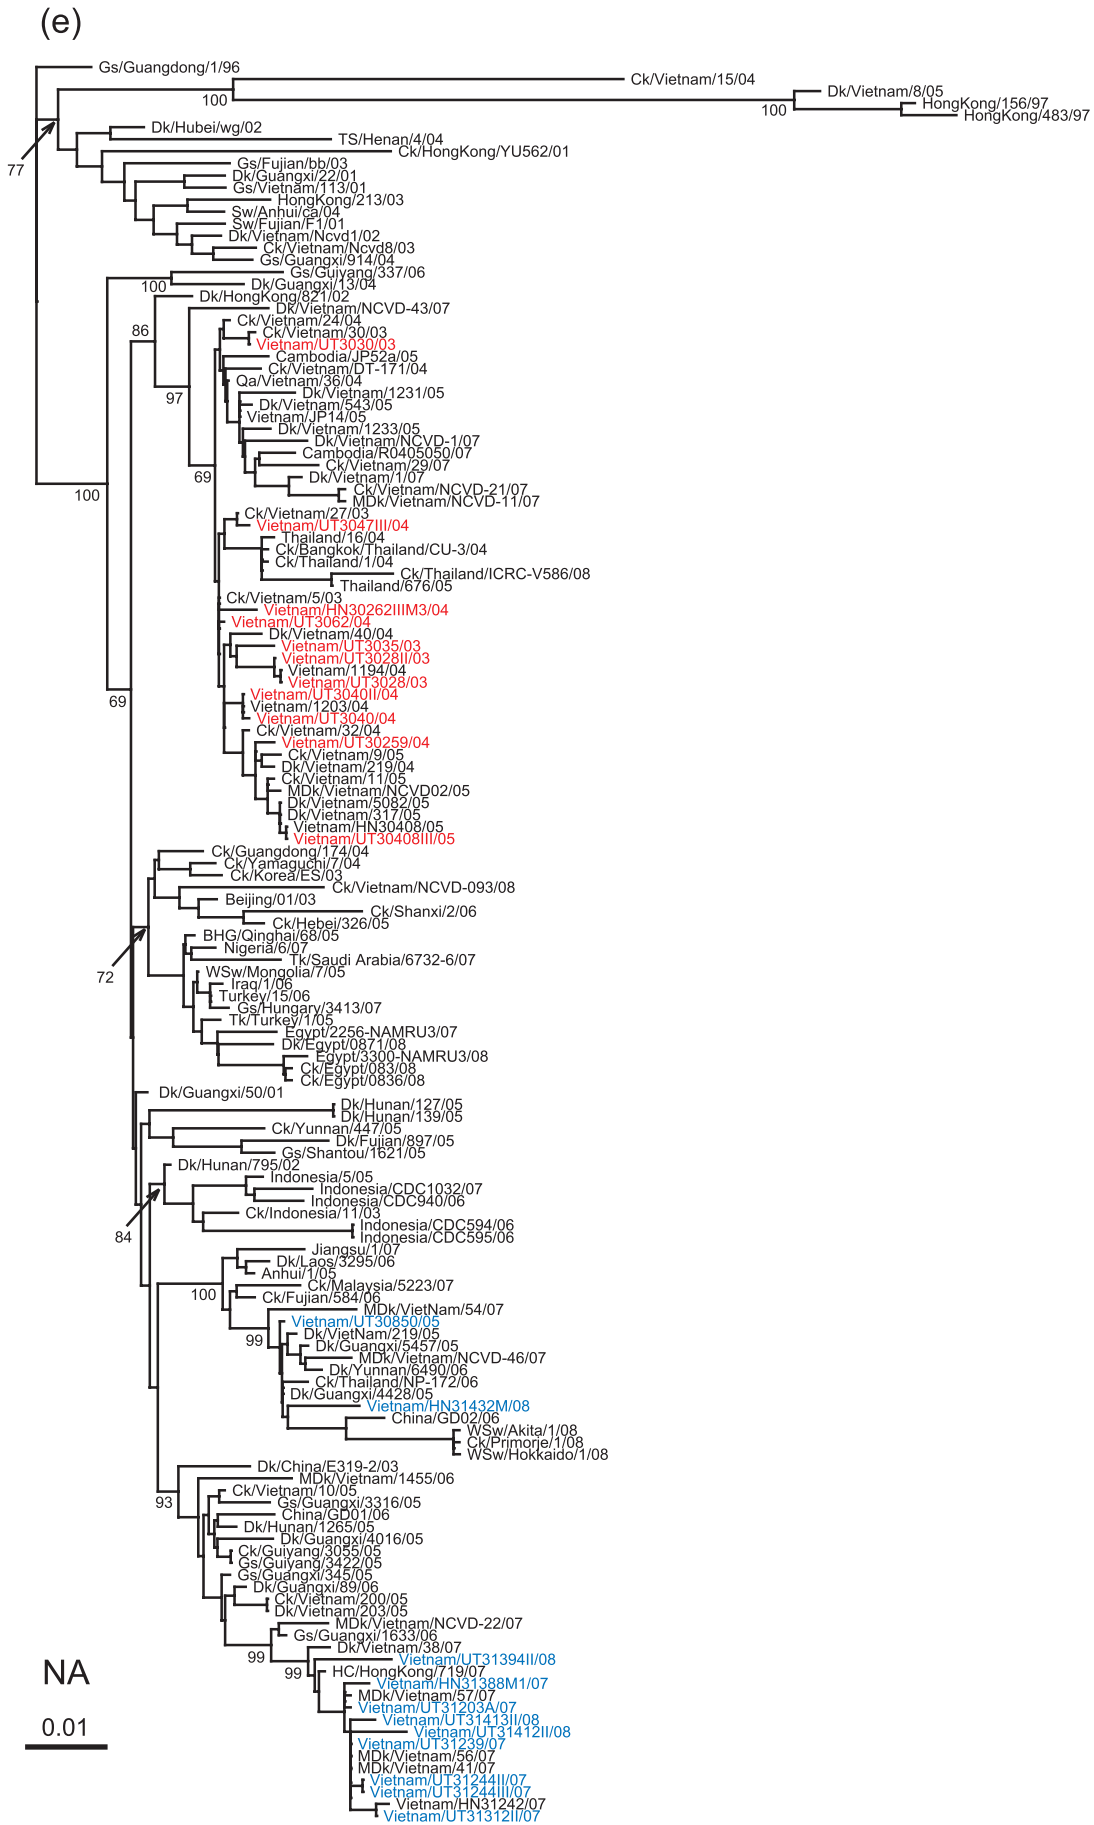

Le, Q. M., Ito, M., Muramoto, Y., Hoang, P. V. M., Vuong, C. D., Sakai-Tagawa, Y., Kiso, M., Ozawa, M., Takano, R. & Kawaoka, Y. (2010). Pathogenicity of highly pathogenic avian H5N1 influenza A viruses isolated from humans between 2003 and 2008 in northern Vietnam. *J Gen Virol* 91, 2485–2490.

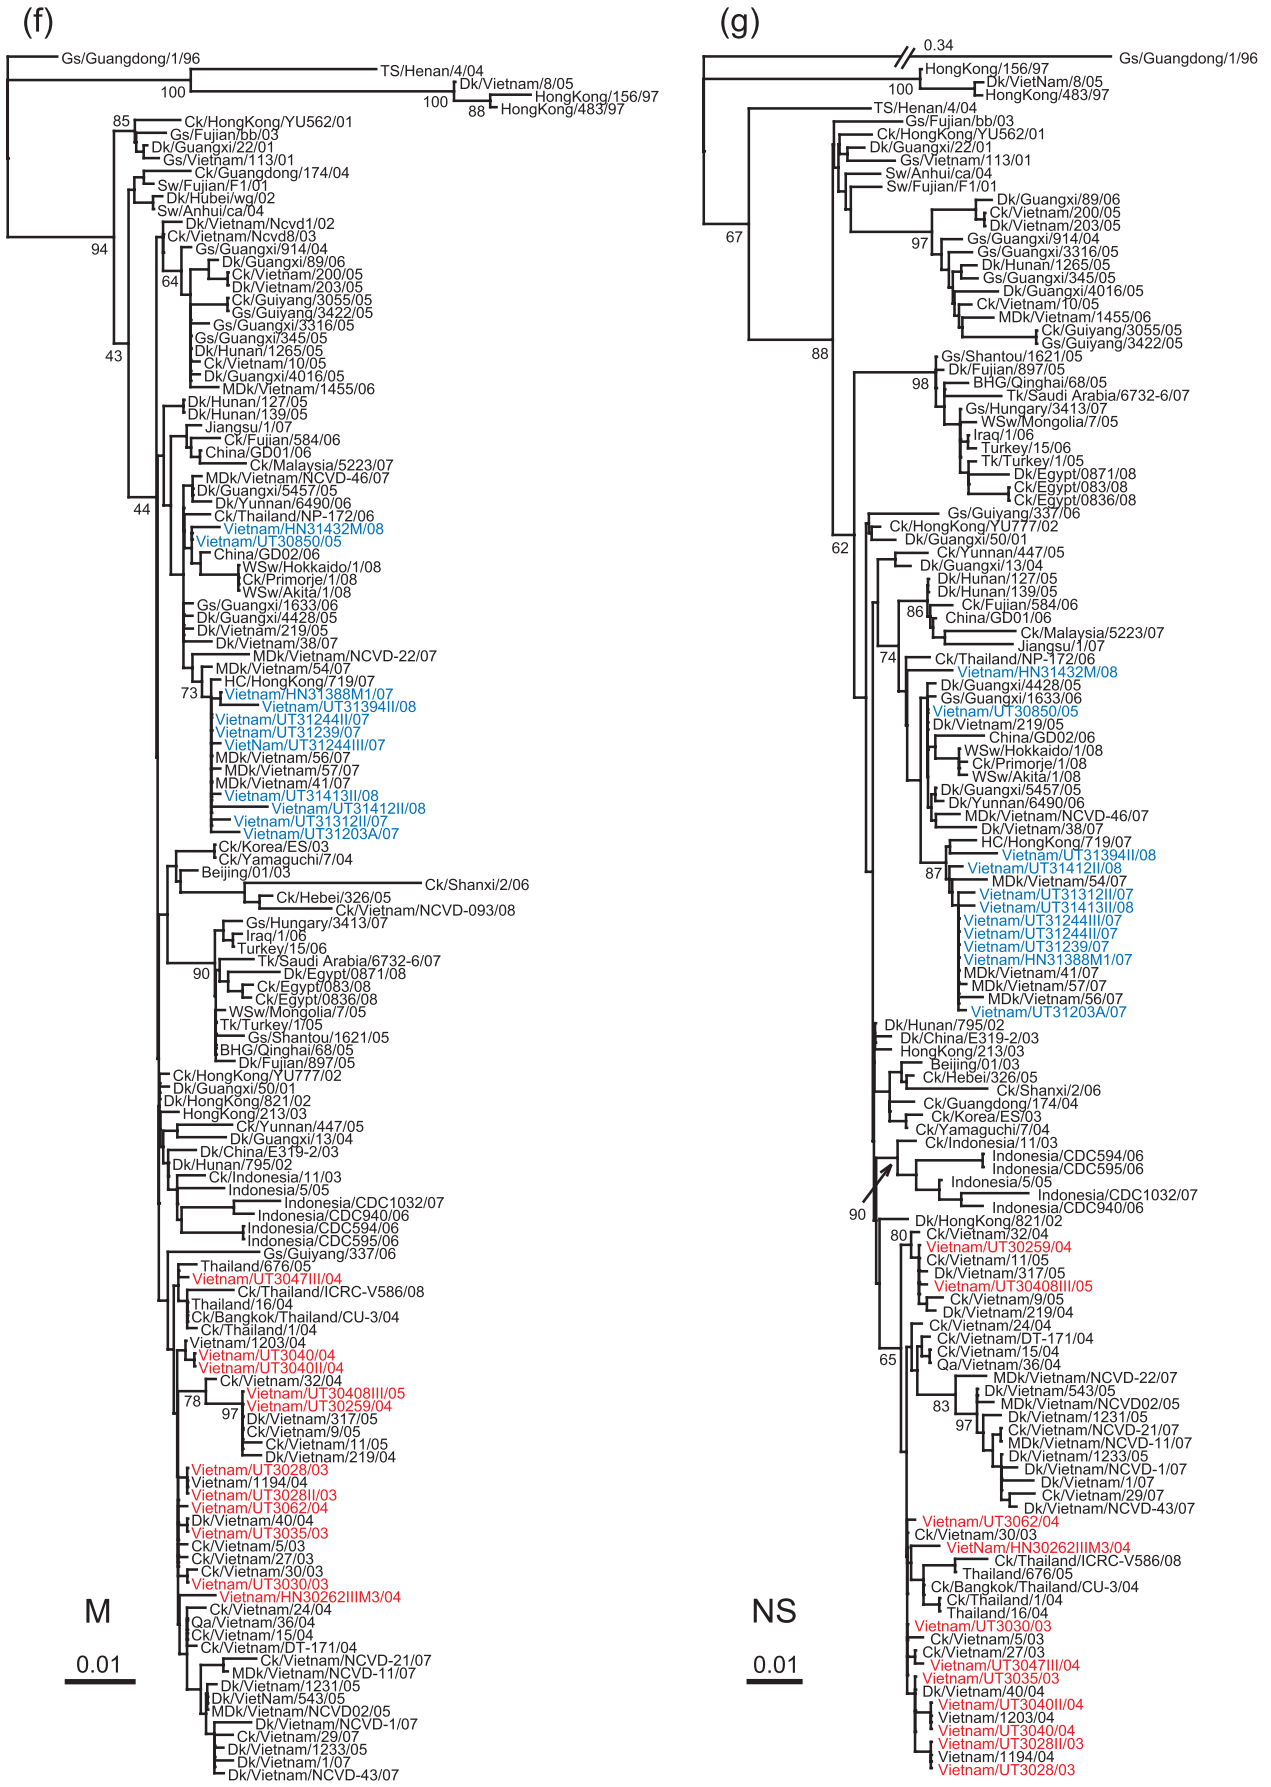

Le, Q. M., Ito, M., Muramoto, Y., Hoang, P. V. M., Vuong, C. D., Sakai-Tagawa, Y., Kiso, M., Ozawa, M., Takano, R. & Kawaoka, Y. (2010). Pathogenicity of highly pathogenic avian H5N1 influenza A viruses isolated from humans between 2003 and 2008 in northern Vietnam. *J Gen Virol* 91, 2485–2490.

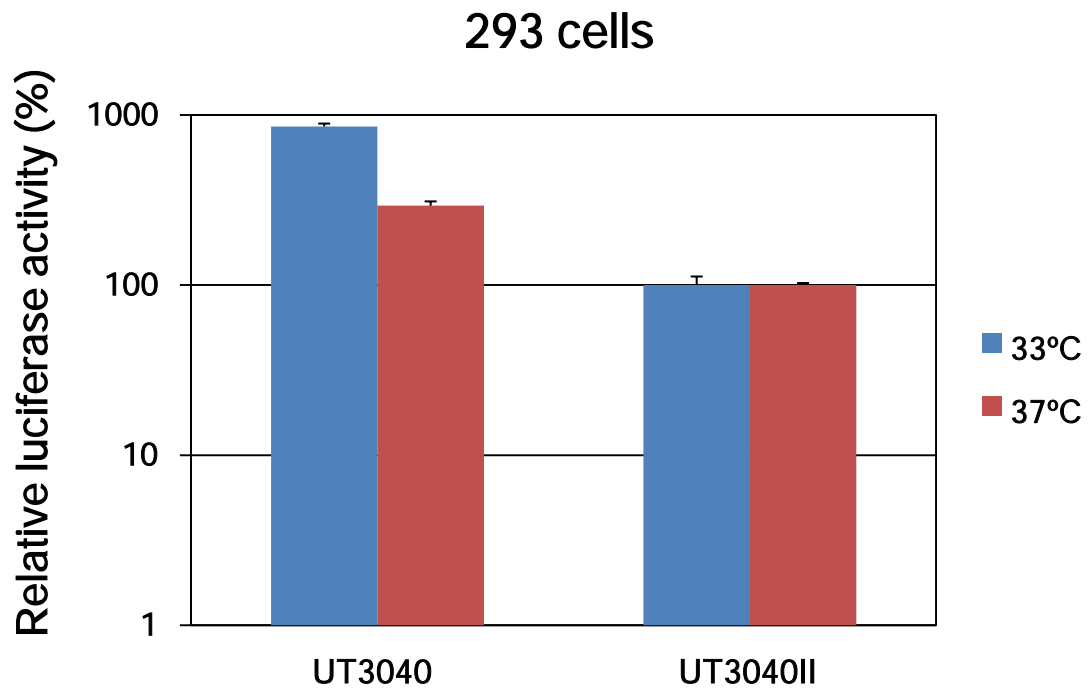

**Supplementary Fig. S3.** Polymerase activity of UT3040 and UT3040II. 293 cells were co-transfected with protein expression plasmids for PB2, PB1, PA and NP from UT3040 and UT3040II and a plasmid for the expression of an influenza viral minigenome encoding firefly luciferase. Twenty-four hours later, the transfected cells were subjected to the dual-luciferase assay. Relative firefly luciferase activity, normalized to the *Renilla* luciferase activity, is shown. Error bars indicate SD of triplicate experiments.

**Supplementary Table S1.** Amino acid differences between UT3040 and UT3040II viruses

| Protein | Amino acid position | Amino acid in: |          |                  |
|---------|---------------------|----------------|----------|------------------|
|         |                     | UT3040         | UT3040II | Other 20 strains |
| PB1     | 536                 | N              | S        | N                |
| PA      | 142                 | E              | K        | K*               |
| NP      | 189                 | M              | I        | M                |

\*UT3028II and HN31432M possess E at this position.
